# Supplementary material for: The first Danish family reported with an AQP5 mutation presenting diffuse non-epidermolytic palmoplantar keratoderma of Bothnian type, hyperhidrosis and frequent Corynebacterium infections: a case report
Source: Springer Nature journal article supplement (doi:10.1186/s12895-016-0044-3), 2016-06-03
Supplement: MOESM1 [file 10244202]

**The first Danish family reported with an AQP5 mutation presenting diffuse non-epidermolytic palmoplantar keratoderma of Bothnian type, hyperhidrosis and frequent *Corynebacterium* infections: a case report**

Additional file 1

**Figure S1.** Genetic test results of the proband. Bidirectional Sanger sequencing of the *AQP5* gene.

Sequence trace showing C to T substitution; the upper trace shows the normal sequence and the lower trace is from the patient:

**Control**

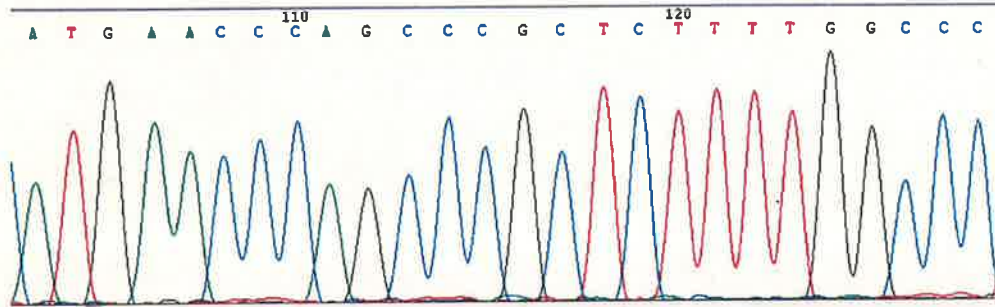

**Patient**

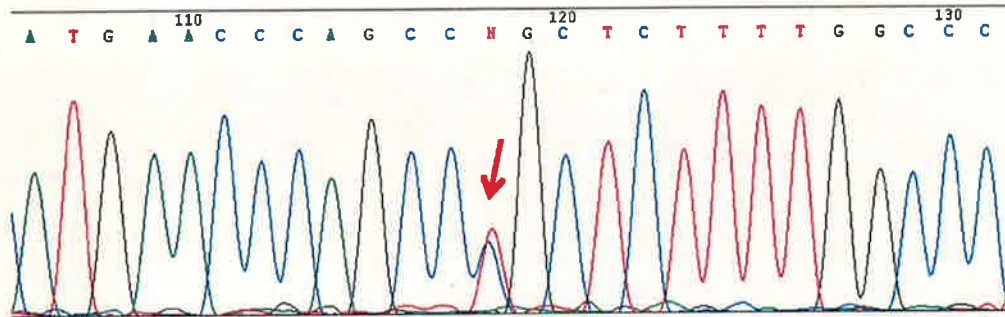

Translation of *AQP5* gene with the mutated residue circled in red:

```

1  CCAGGCCGCCAGCCTCGGAGTGGGCCGGGACAGTGCCGGCGCCCGCAGCCAGGCCCC
   .....
61  CGCCCCCGCCGATCCACCTCCTCCGCCGCCTGCGACCCAAACGGGGCGCCCCCGCCGGG
   .....
121  CAGCTGCCCGCCGGGCCCGCCGCGCCACCATGAAGAAGGAGGTGTGCTCCGTGGCCTTCCT
   .....-M--K--K--E--V--C--S--V--A--F--L
181  CAAGGCCGTGTTTCGAGAGTTCTTGGCCACCCTCATCTTCGTCTTCTTTGGCCTGGGCTC
   11  --K--A--V--F--A--E--F--L--A--T--L--I--F--V--F--F--G--L--G--S
241  GGCCCTCAAGTGGCCGTCGGCGCTGCCTACCATCCTGCAGATCGCGCTGGCGTTTGGCCT
   31  --A--L--K--W--P--S--A--L--P--T--I--L--Q--I--A--L--A--F--G--L

```

301 GGGCATAGGCACGCTGGCCAGGCCCTGGGACCCGTGAGCGGCGCCACATCAACCCCGC  
51 --A--I--G--T--L--A--Q--A--L--G--P--V--S--G--G--H--I--N--P--A

361 CATCACCTGGCCCTCTTGGTGGGCAACCAGATCTCGCTGCTCCGGGCTTCTTCTACGT  
71 --I--T--L--A--L--L--V--G--N--Q--I--S--L--L--R--A--F--F--Y--V

421 GCGGGCCAGCTGGTGGGCGCCATTGCCGGGCTGGCATCCTCTACGGTGTGGCACCGCT  
91 --A--A--Q--L--V--G--A--I--A--G--A--G--I--L--Y--G--V--A--P--L

481 CAATGCCCGGGCAATCTGGCCGTCAACGCGCTCAACAACAACAACGCAGGGCCAGGC  
111 --N--A--R--G--N--L--A--V--N--A--L--N--N--N--T--T--Q--G--Q--A

541 CATGGTGGTGGAGCTGATTCTGACCTCCAGCTGGCACTCTGCATCTTCGCCTCCACTGA  
131 --M--V--V--E--L--I--L--T--F--Q--L--A--L--C--I--F--A--S--T--D

601 CTCCCGCCGCACCAGCCCTGTGGGCTCCCAGCCCTGTCCATTGGCCTGTCTGTACCCT  
151 --S--R--R--T--S--P--V--G--S--P--A--L--S--I--G--L--S--V--T--L

661 GGGCCACCTTGTCCGAATCTACTTCACTGGCTGCTCCATGAACCCAGCCGCTCTTTTGG  
171 --G--H--L--V--G--I--Y--F--T--G--C--S--M--N--P--A--R--S--F--G

721 CCCTGCGGTGGTCATGAATCGGTTCAAGCCCGCTCACTGGGTTTTCTGGGTAGGGCCAT  
191 --P--A--V--V--M--N--R--F--S--P--A--H--W--V--F--W--V--G--P--I

781 CGTGGGGCGGTCTGGCTGCCATCCTTTACTTCTACCTGCTCTTCCCAACTCCCTGAG  
211 --V--G--A--V--L--A--A--I--L--Y--F--Y--L--L--F--P--N--S--L--S

841 CCTGAGTGAGCGTGTGGCCATCATCAAAGGCACGTATGAGCCTGACGAGGACTGGGAGGA  
231 --L--S--E--R--V--A--I--I--K--G--T--Y--E--P--D--E--D--W--E--E

901 GCAGCGGAAGAGCGGAAGAAGACCATGGAGCTGACCACCCGCTGACCAGTGTACAGGCAG  
251 --Q--R--E--E--R--K--K--T--M--E--L--T--T--R--\*--.....

961 GGGCCAGCCCTCAGCCCTGAGCCAAGGGGAAAAGAAGAAAAGTACCTAACACAAGC  
.....

1021 TTCCTTTTTGCACAACCGGTCCTCTTGGCTGAGGAGGAGGAGCTGGTCACCCCTGGCTGCA  
.....

1081 CAGTTAGAGAGGGGAGAAGGAACCCATGATGGGACTCCTGGGGTAGGGGCCAGGGGCTGG  
.....

1141 GGTCTGCTGGGGACAGGTCTCTCTGGGACAGACCTCAGAGATTGTGAATGCAGTGCCAAG  
.....

1201 CTCACAGGCTCCAAGGGCCAGGCCAGAAAAGGGCGGGCTGCAGCCTGCACCCCCACCT  
.....

1261 TCCCCAACCCCTTCCTCAAGAGCTGAAGGGATCCCAGCCCCTAGGTGGGCAGAGCCAGACC  
 .....  
 1321 CTCCCCAGAGCTCCTTAGGAAGNACACAGACTGGTTCATGAATGCCGCTTATTTATT  
 .....  
 1381 CTGGTGAGGATGCATGCGTGGGGCTGCTGGTGTTTAGAGTGGGGCTACCCAATAAATCA  
 .....  
 1441 CTGATACTCA  
 .....

**Key**

Codons      Alternating codons      Alternating codons  
 Exons        Alternating exons        Alternating exons  
 Other features    UTR

**Variation summary**

| Variation | Genotype     | Exon | Predicted change |
|-----------|--------------|------|------------------|
| c.562C>T  | Heterozygous | 3    | p.Arg188Cys      |

**Comments**

The patient was heterozygous for the single nucleotide mutation c.562C>T in exon 3 of the *AQP5* gene, predicted to cause a missense change, p.Arg188Cys, at the protein level (Blaydon *et al.* (2013) *AJHG* 93(2):330-5.).
